# Supplementary material for: Problems in the synthesis of cyclic peptides through use of the Dmab protecting group †
Source: Royal Society of Chemistry journal article supplement (doi:10.1039/b001694m), 2000-01-01
Supplement: b001694m.doc [file b001694m.doc]

**Supplementary data**

**Problems in the synthesis of cyclic peptides through use of the Dmab protecting group**

# Tony Johnson,* Mark Liley, Timothy J. Cheeseright and Farida Begum

Peptide Therapeutics, Peterhouse Technology Park, 100 Fulbourn Road, Cambridge, UK CB1 9PT

**HPLC chromatograms**

**
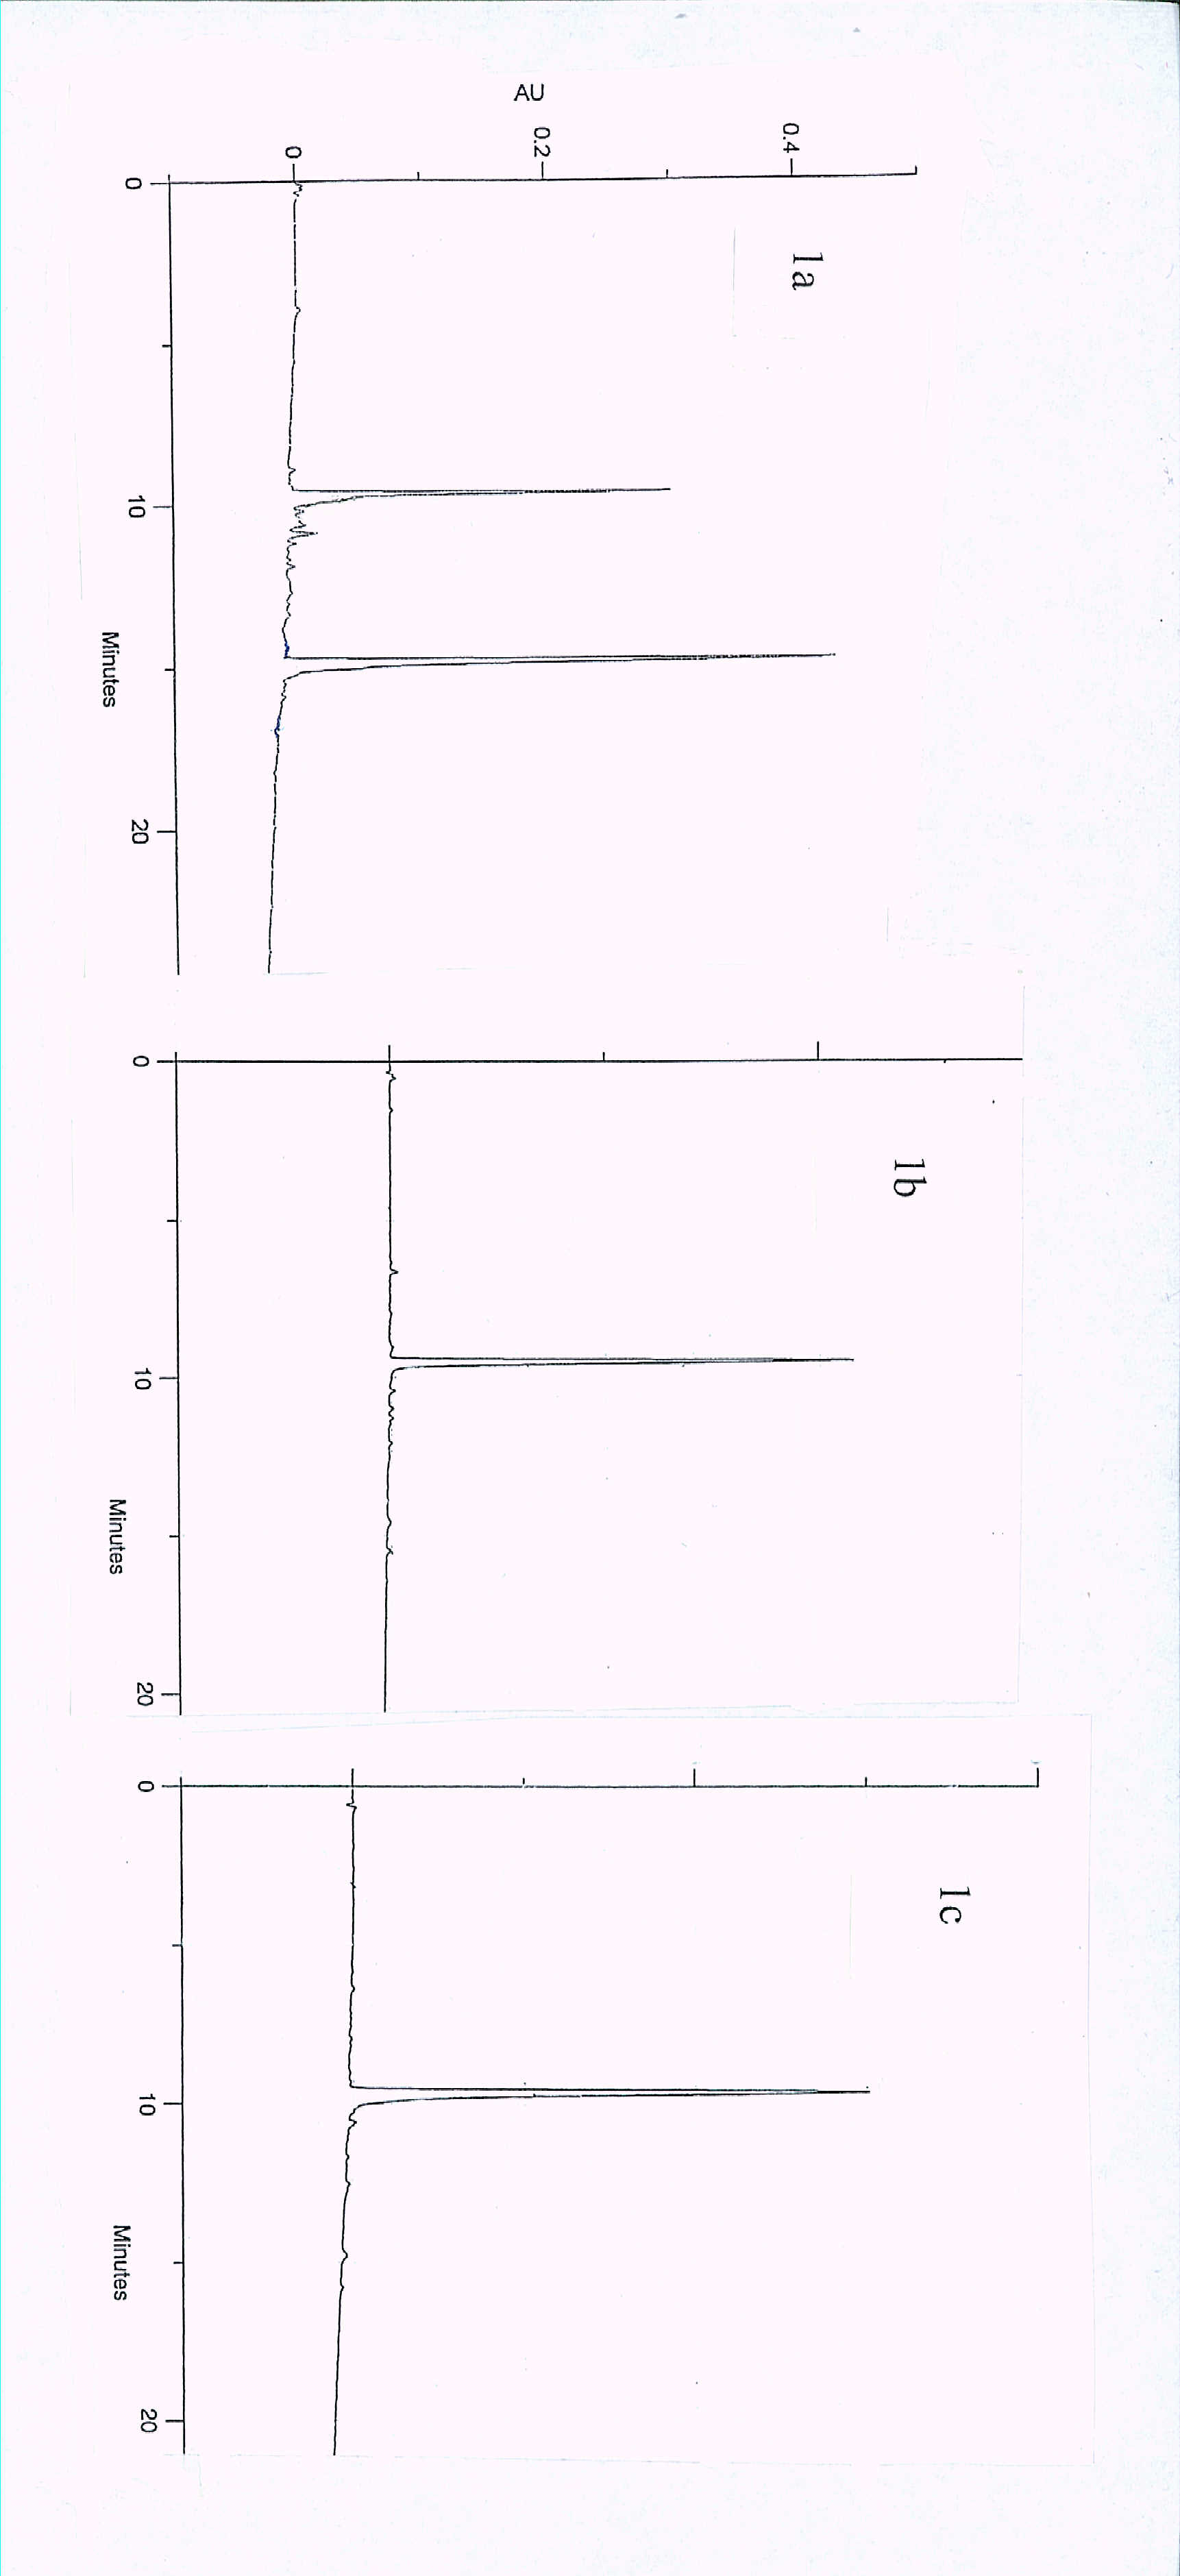
**

**Fig. 1**Analytical HPLC chromatograms of (a) small scale cleavage product from peptide-resin **3a** [*via* Glu(ODmab), Scheme 1]; (b) small scale cleavage product from peptide-resin **3g** [*via* Glu(OBut), Scheme 1]; (c) small scale cleavage product from peptide-resin **6** (Glp peptide, Scheme 2). HPLC conditions: Phenomenex reverse phase C4 column (250 x 4.6 mm), 10-90% B in A linear gradient over a period of 25 min (flow rate 1.5 cm3 min-1; 215 nm UV detection) where buffer A = 0.1% aq. TFA and buffer B = 90% acetonitrile/10% buffer A.

**
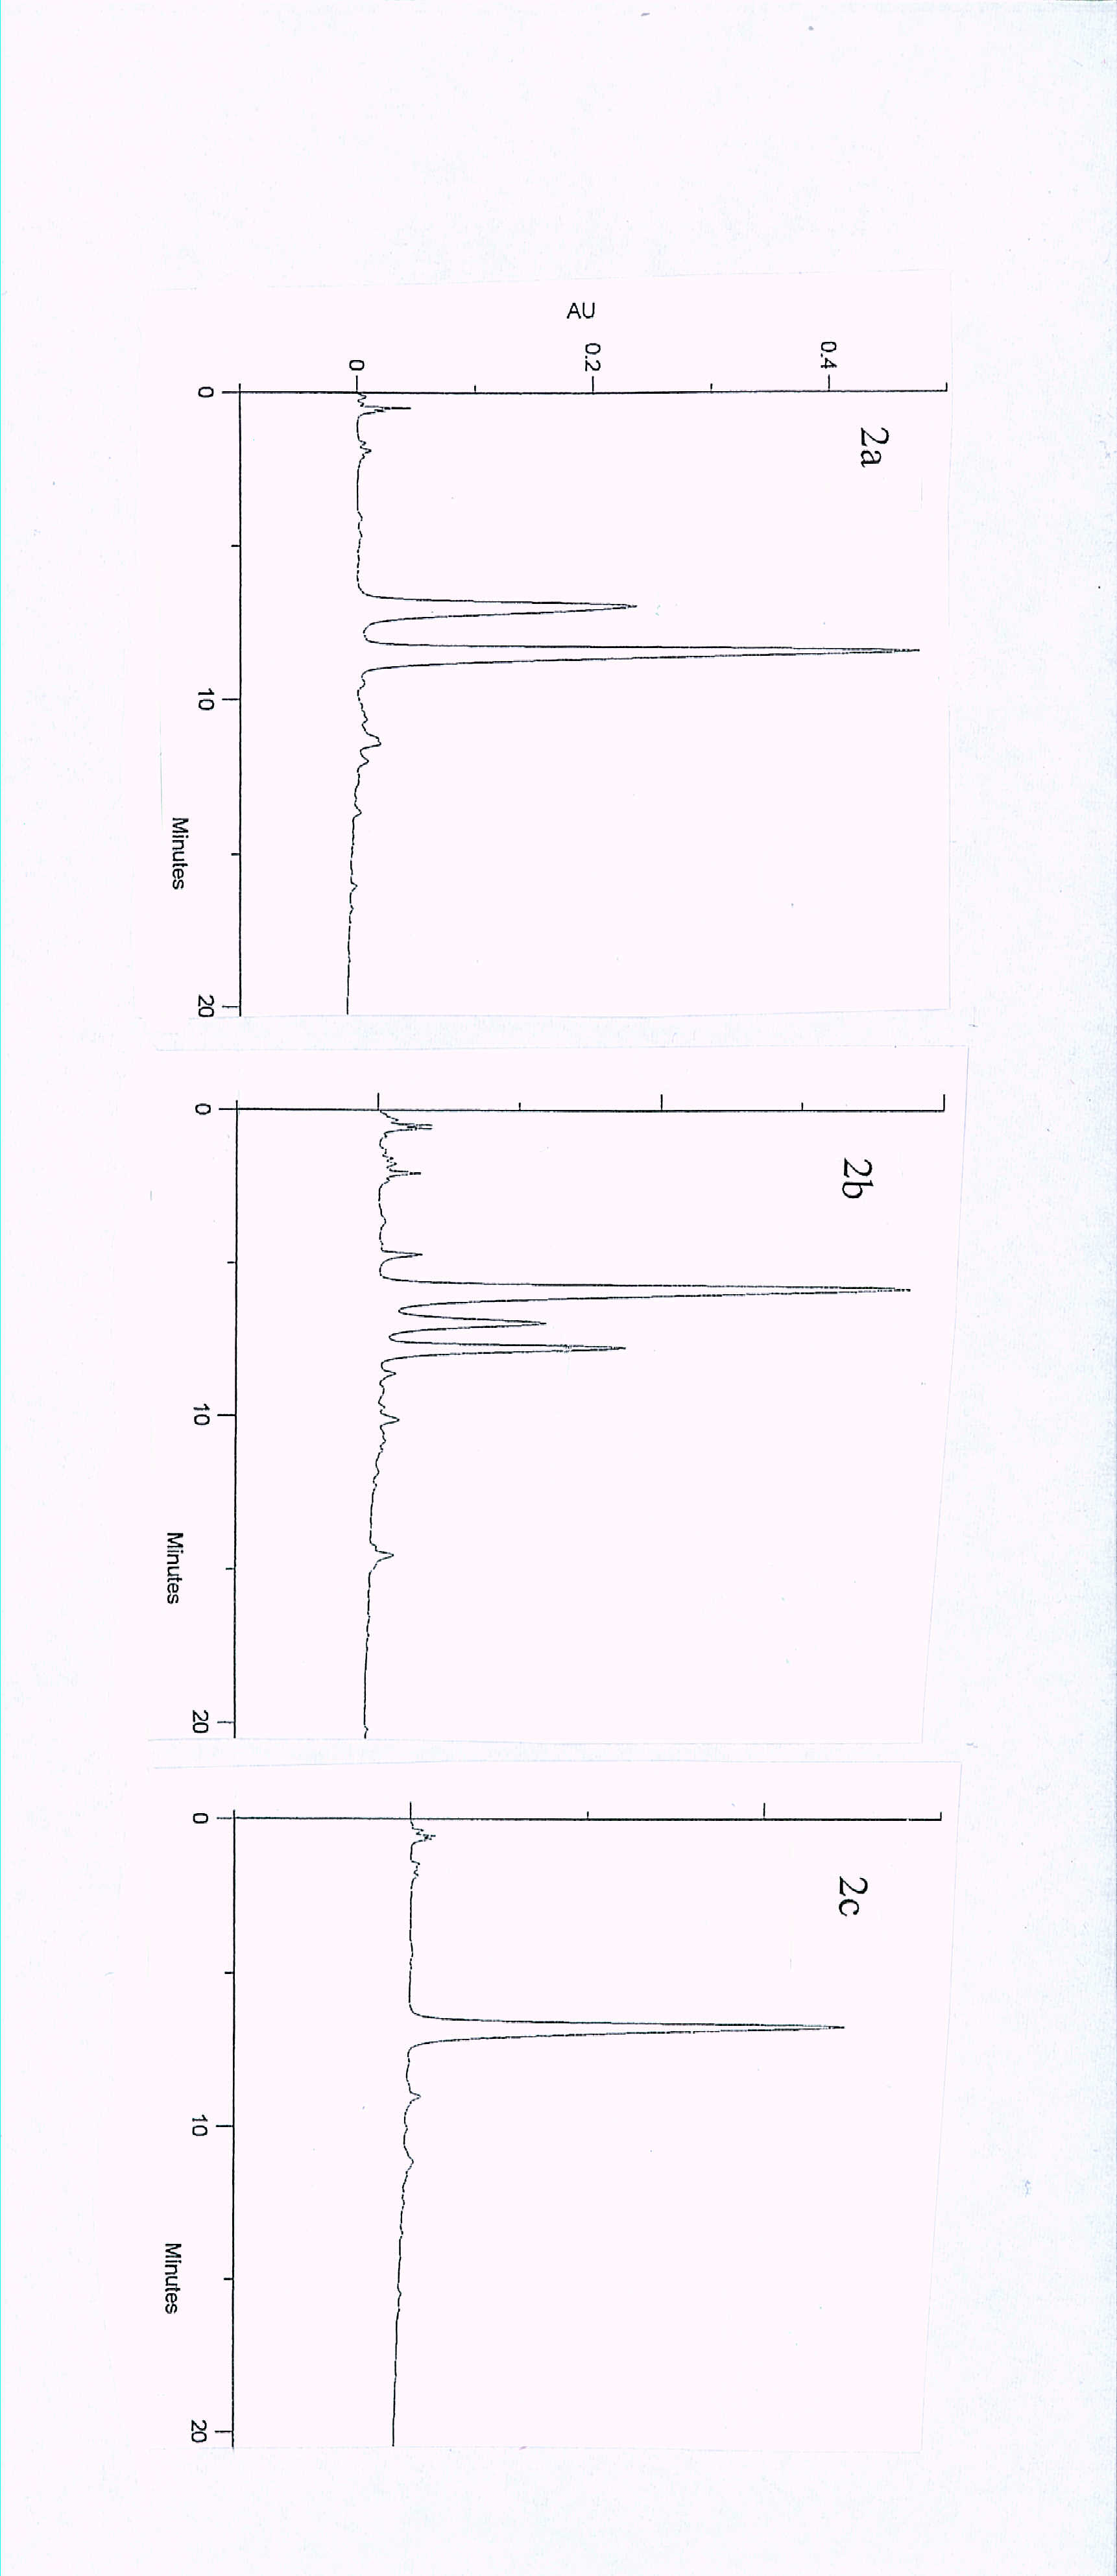
**

**Fig. 2**Analytical HPLC chromatograms of (a) crude peptide **5e** [*via* Glu(ODmab), Scheme 1]; (b) crude peptide **5f** [*via* Glu(OBut), Scheme 1]; (c) crude peptide **5f** (post incubation in acetonitrile/0.1% aq. TFA for 24 hours). HPLC conditions: Phenomenex reverse phase C4 column (250 x 4.6 mm), 10-90% B in A linear gradient over a period of 25 min (flow rate 1.5 cm3 min-1; 215 nm UV detection) where buffer A = 0.1% aq. TFA and buffer B = 90% acetonitrile/10% buffer A.


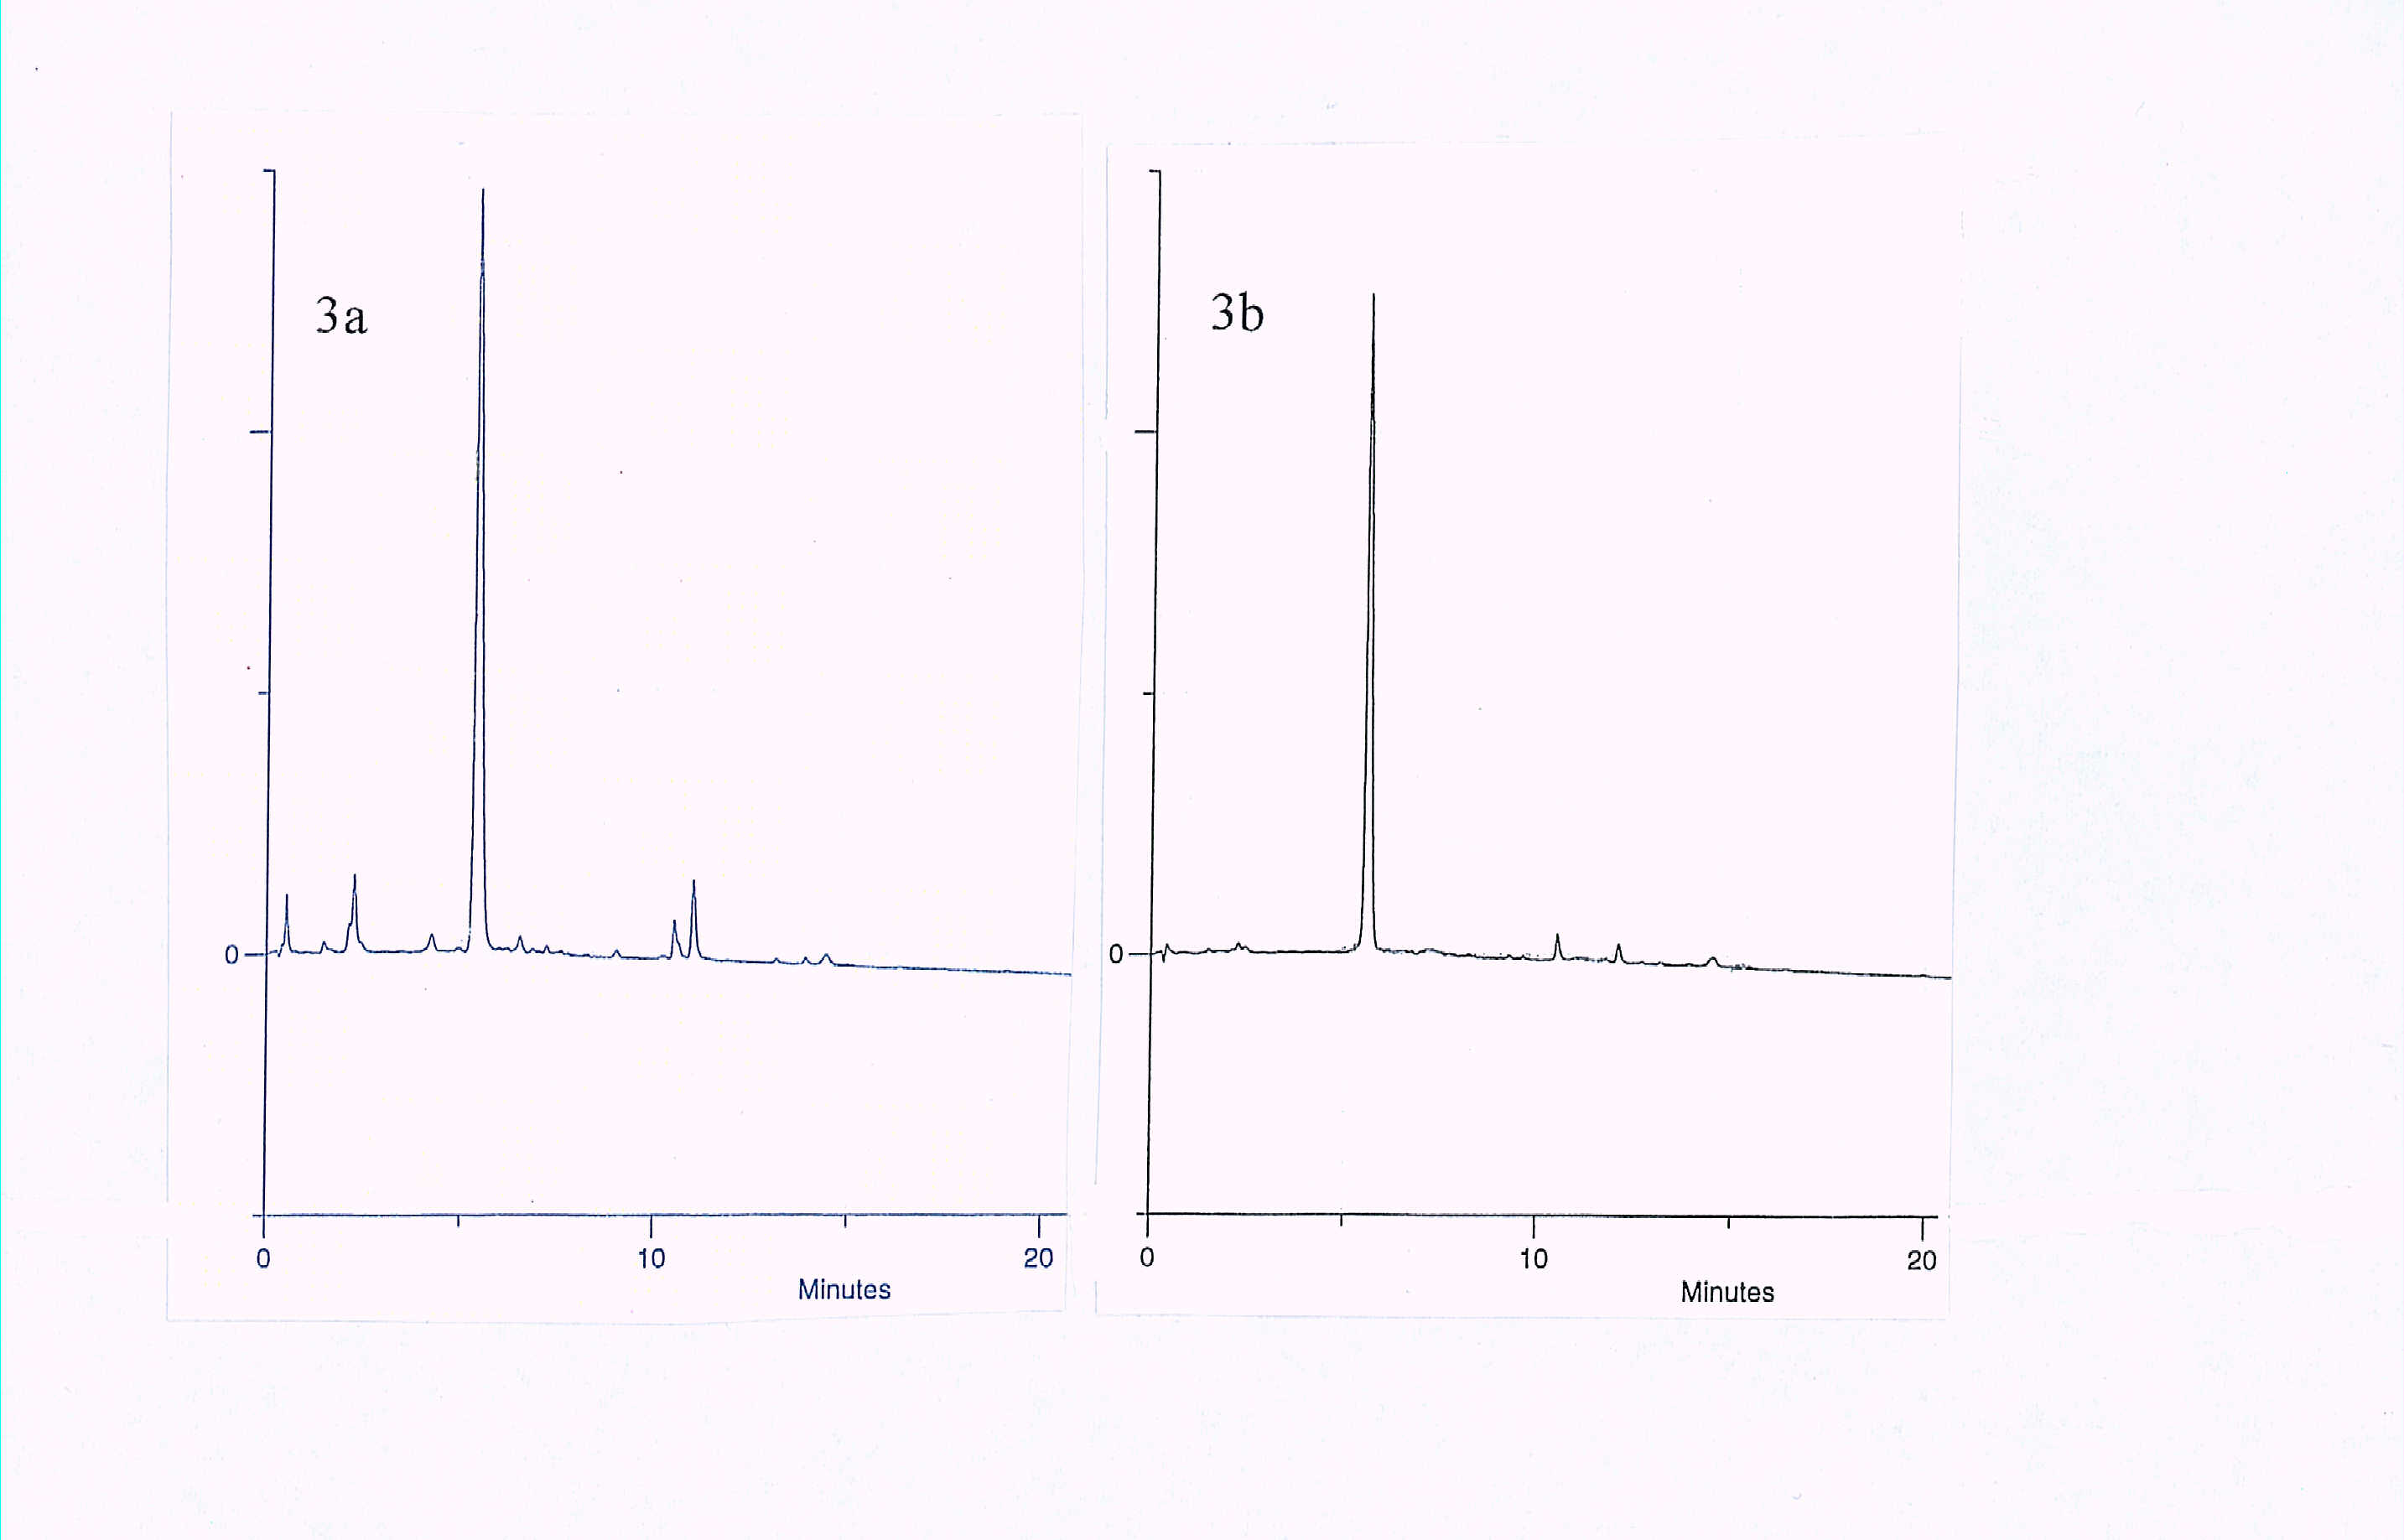


**Fig. 3** Analytical HPLC chromatograms of (a) crude peptide **5g** [via Glu(OBut), Scheme 1]; (b) crude peptide **8** (Glp peptide, scheme 2). HPLC conditions: Phenomenex reverse phase C4 column (250 x 4.6 mm), 10-90% B in A linear gradient over a period of 25 min (flow rate 1.5 cm3 min-1; 215 nm UV detection) where buffer A = 0.1% aq. TFA and buffer B = 90% acetonitrile/10% buffer A.

**
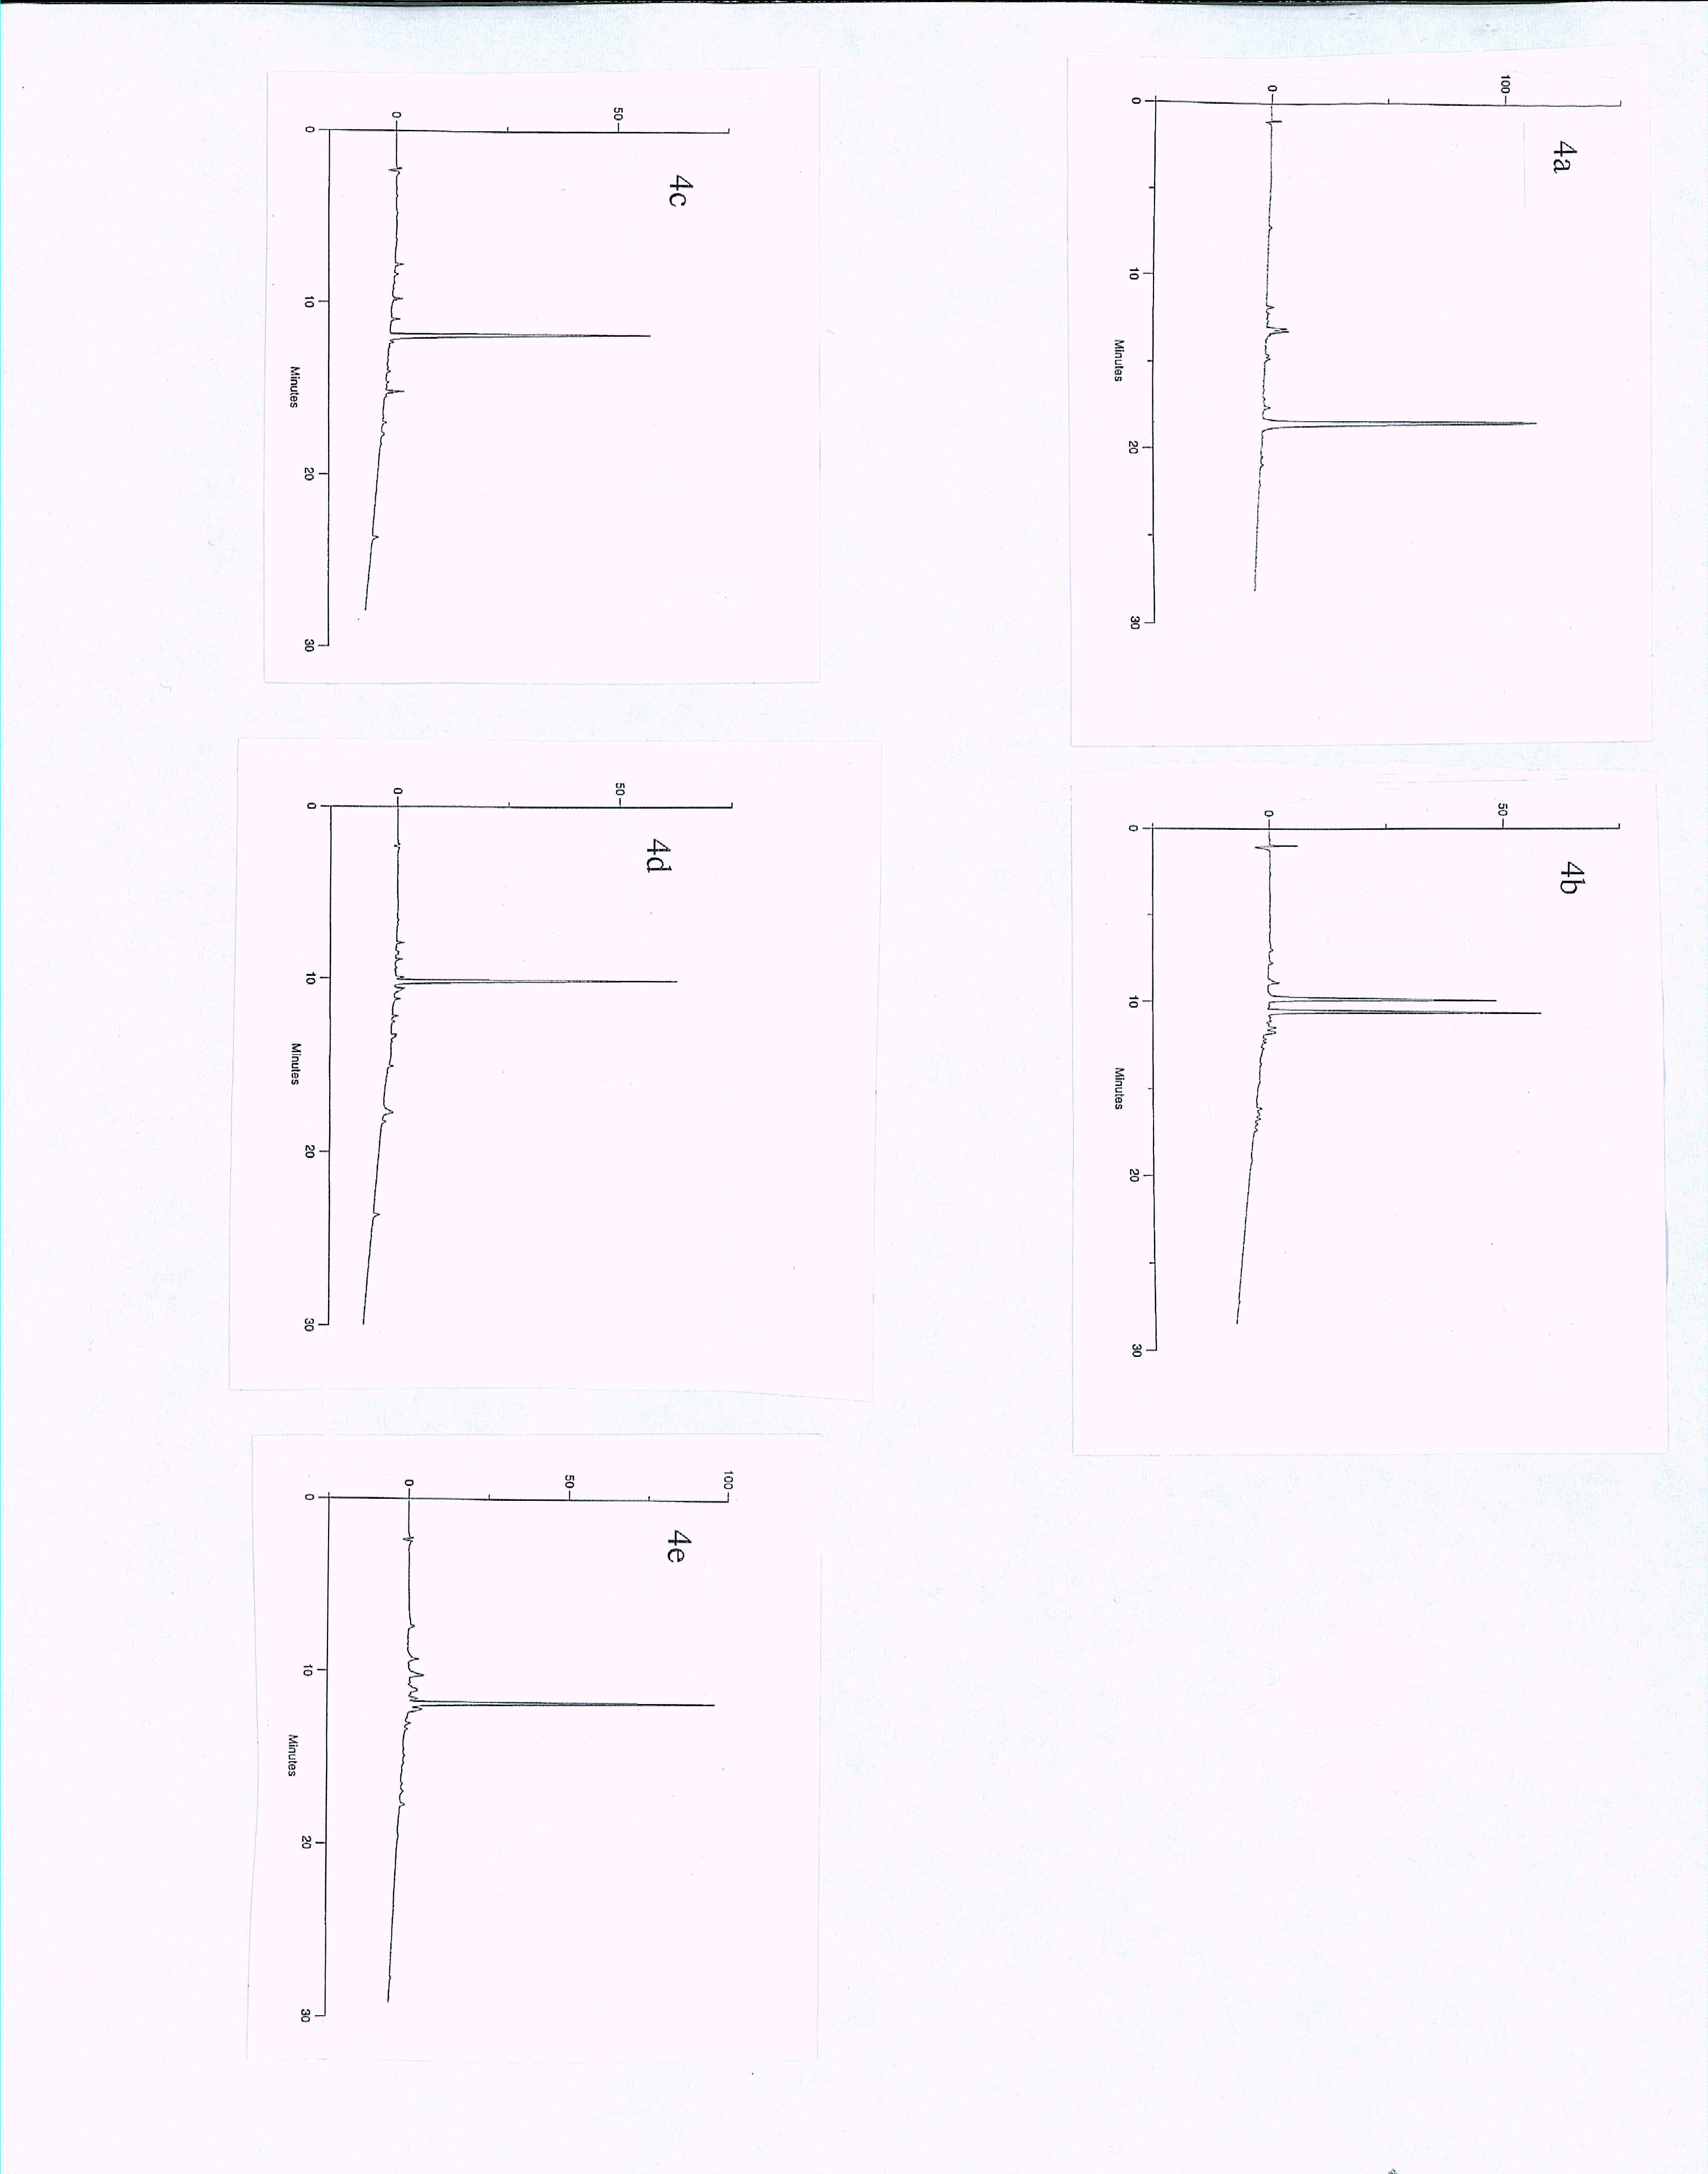
**

**Fig. 4**Analytical HPLC chromatograms of (a) small scale cleavage product from peptide-resin **9a** [*via* Glu(ODmab), Scheme 3]; (b) crude cyclic peptide **13** [*via* Glu(ODmab), Scheme 3]; (c) small scale cleavage product from peptide-resin **10b** [*via* Glu(OAllyl), Scheme 3]; (d) small scale cleavage product from peptide-resin **11** (*via* Glu(Allyl), Scheme 3); (e) crude cyclic peptide **13** [*via* Glu(OAllyl), Scheme 3]; HPLC conditions: Phenomenex reverse phase C4 column (250 x 4.6 mm), 10-90% B in A linear gradient over a period of 25 min (flow rate 1.5 cm3 min-1; 215 nm UV detection) where buffer A = 0.1% aq. TFA and buffer B = 90% acetonitrile/10% buffer A.
